# Supplementary material for: Association of the rs2111234, rs3135499, rs8057341 polymorphisms in the NOD2 gene with leprosy: A case-control study in the Norte de Santander, Colombia population
Source: PubMed Central journal article supplement (PMC9987820; doi:10.1371/journal.pone.0281553), 2023-03-06
Supplement: pone.0281553.s002.pdf [file pone.0281553.s002.pdf]

DETERMINACIÓN DE POLIMORFISMOS GENÉTICOS ASOCIADOS CON SUSCEPTIBILIDAD PARA ENFERMEDAD DE HANSEN EN POBLACIÓN DEL DEPARTAMENTO DE NORTE DE SANTANDER.

|                                         |  |
|-----------------------------------------|--|
| codigo ID                               |  |
| NOMBRE                                  |  |
| APELLIDO                                |  |
| APELLIDO2                               |  |
| ID                                      |  |
| identificacion                          |  |
| fecha notificacion                      |  |
| registro EN EL ESTUDIO                  |  |
| Municipio de residencia                 |  |
| direccion contacto                      |  |
| telefono contacto                       |  |
| Estado caso o control                   |  |
| Edad años                               |  |
| sexo                                    |  |
| Municipio de nacimiento                 |  |
| Municipio de procedencia                |  |
| Municipio de nacimiento del padre       |  |
| Municipio de nacimiento de la madre     |  |
| Clasificación de la enfermedad en casos |  |
| Etnia                                   |  |
| rs3088362-Adenina                       |  |
| rs3088362-Timina                        |  |
| rs3088362-Guanina                       |  |
| rs3088362-Citocina                      |  |
| rs3088362-Adenina homocigoto            |  |
| rs3088362-Timina homocigoto             |  |
| rs3088362-Guanina homocigoto            |  |
| rs3088362-Citocina homocigoto           |  |
| rs3764147-Adenina                       |  |
| rs3764147-Timina                        |  |
| rs3764147-Guanina                       |  |
| rs3764147-Citocina                      |  |
| rs3764147-Adenina homocigoto            |  |
| rs3764147-Timina homocigoto             |  |
| rs3764147-Guanina homocigoto            |  |
| rs3764147-Citocina homocigoto           |  |
| rs10507522-Adenina                      |  |
| rs10507522-Timina                       |  |
| rs10507522-Guanina                      |  |
| rs10507522-Citocina                     |  |
| rs10507522-Adenina homocigoto           |  |
| rs10507522-Timina homocigoto            |  |
| rs10507522-Guanina homocigoto           |  |
| rs10507522-Citocina homocigoto          |  |

DETERMINACIÓN DE POLIMORFISMOS GENÉTICOS ASOCIADOS CON SUSCEPTIBILIDAD PARA ENFERMEDAD DE HANSEN EN POBLACIÓN DEL DEPARTAMENTO DE NORTE DE SANTANDER.

|                                |  |
|--------------------------------|--|
| rs9302752-Adenina              |  |
| rs9302752-Timina               |  |
| rs9302752-Guanina              |  |
| rs9302752-Citocina             |  |
| rs9302752-Adenina homocigoto   |  |
| rs9302752-Timina homocigoto    |  |
| rs9302752-Guanina homocigoto   |  |
| rs9302752-Citocina homocigoto  |  |
| rs7194886-Adenina              |  |
| rs7194886-Timina               |  |
| rs7194886-Guanina              |  |
| rs7194886-Citocina             |  |
| rs7194886-Adenina homocigoto   |  |
| rs7194886-Timina homocigoto    |  |
| rs7194886-Guanina homocigoto   |  |
| rs7194886-Citocina homocigoto  |  |
| rs4574921-Adenina              |  |
| rs4574921-Timina               |  |
| rs4574921-Guanina              |  |
| rs4574921-Citocina             |  |
| rs4574921-Adenina homocigoto   |  |
| rs4574921-Timina homocigoto    |  |
| rs4574921-Guanina homocigoto   |  |
| rs4574921-Citocina homocigoto  |  |
| rs10114470-Adenina             |  |
| rs10114470-Timina              |  |
| rs10114470-Guanina             |  |
| rs10114470-Citocina            |  |
| rs10114470-Adenina homocigoto  |  |
| rs10114470-Timina homocigoto   |  |
| rs10114470-Guanina homocigoto  |  |
| rs10114470-Citocina homocigoto |  |
| rs6478108-Adenina              |  |
| rs6478108-Timina               |  |
| rs6478108-Guanina              |  |
| rs6478108-Citocina             |  |
| rs6478108-Adenina homocigoto   |  |
| rs6478108-Timina homocigoto    |  |
| rs6478108-Guanina homocigoto   |  |
| rs6478108-Citocina homocigoto  |  |
|                                |  |
|                                |  |
|                                |  |
|                                |  |
